# Supplementary material
Source: Springer Nature journal article supplement (https://www.springermedizin.de/resource/supplementary/12962_2006_37_MOESM1_ESM.pdf/9572000)

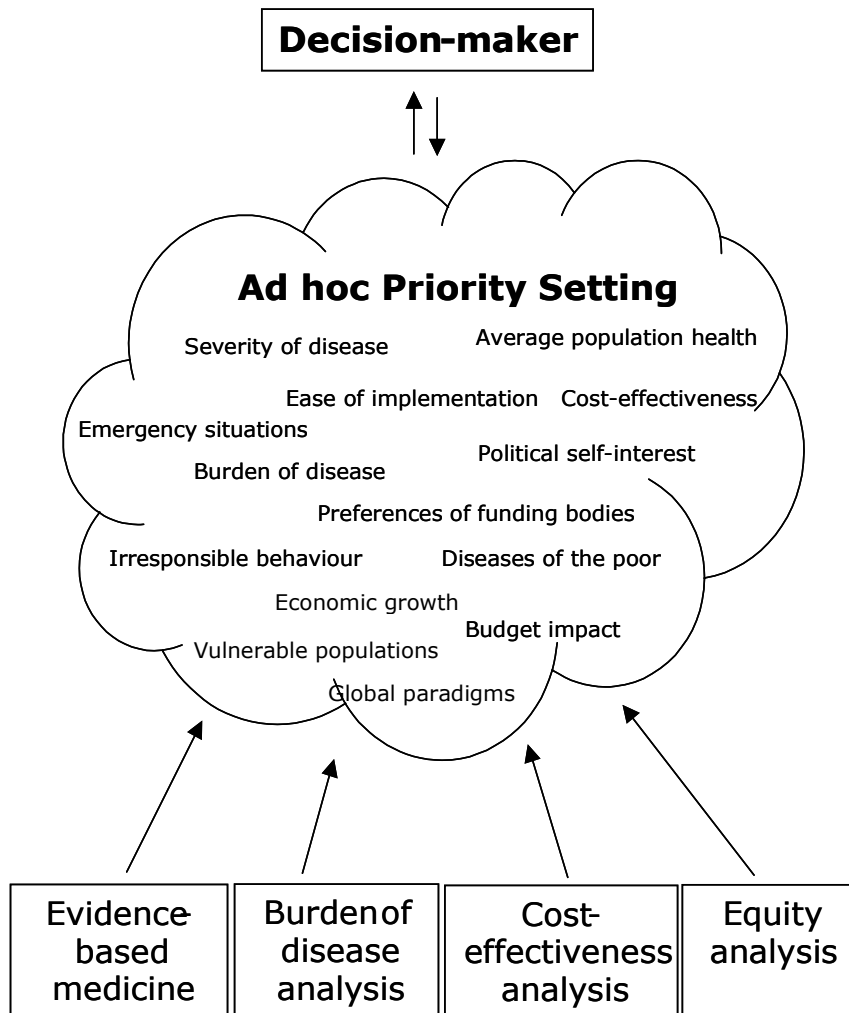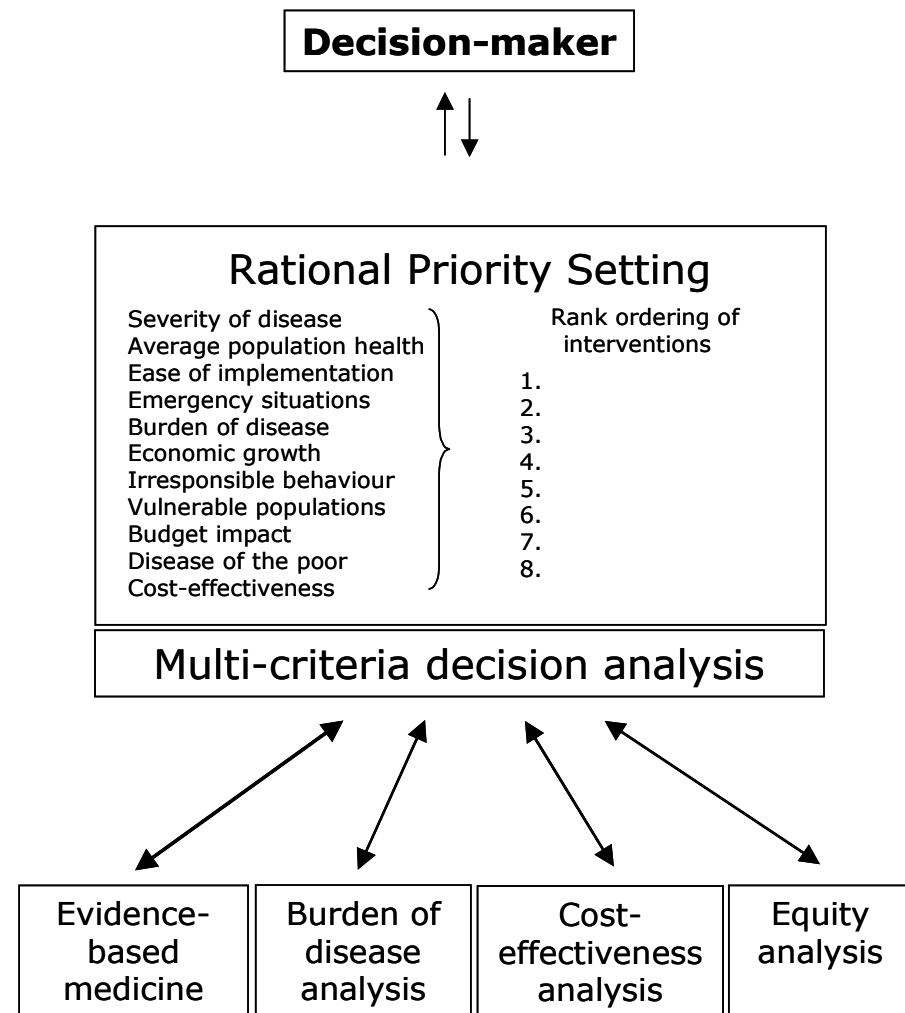

Supplement: MOESM1 [file 9572000]
